# Supplementary material for: Cp2TiCl2-catalyzed hydrocarboxylation of alkynes with CO2: formation of α,β-unsaturated carboxylic acids
Source: Royal Society of Chemistry journal article supplement (doi:10.1039/c6ra25003c), 2017-01-01
Supplement: c6ra25003c1.pdf [file c6ra25003c1.pdf]

**Cp<sub>2</sub>TiCl<sub>2</sub>-Catalyzed Hydrocarboxylation of Alkynes with CO<sub>2</sub>: Formation of  $\alpha,\beta$ -  
Unsaturated Carboxylic Acids**

Peng Shao,<sup>†</sup> Sheng Wang,<sup>†</sup> Gaixia Du,<sup>\*,†</sup> and Chanjuan Xi<sup>\*,†,‡</sup>

<sup>†</sup>*Key Laboratory of Bioorganic Phosphorus Chemistry & Chemical Biology (Ministry of Education), Department of Chemistry, Tsinghua University, Beijing 100084, China*

<sup>‡</sup>*State Key Laboratory of Elemento-Organic Chemistry, Nankai University, Tianjin 300071, China*

Email: cjxi@tsinghua.edu.cn

List of the contents:

Copies of <sup>1</sup>H and <sup>13</sup>C NMR Spectra.....S2

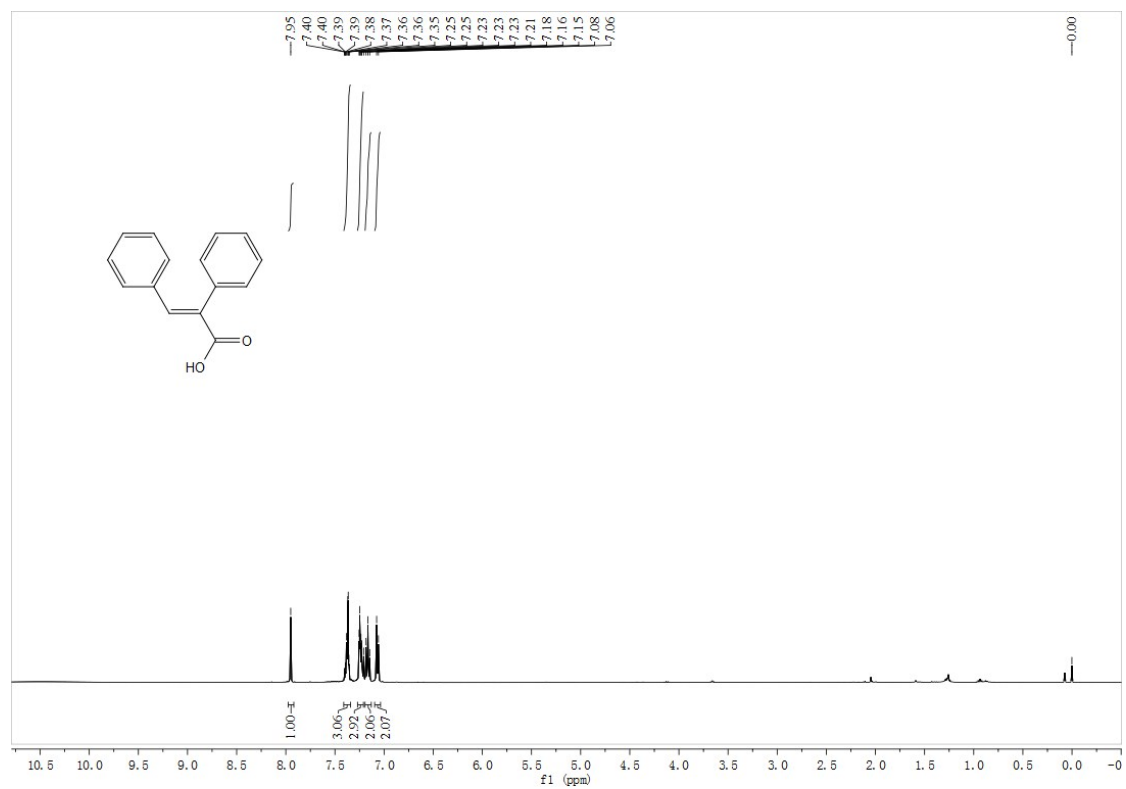

$^1\text{H NMR}$  of **2a**

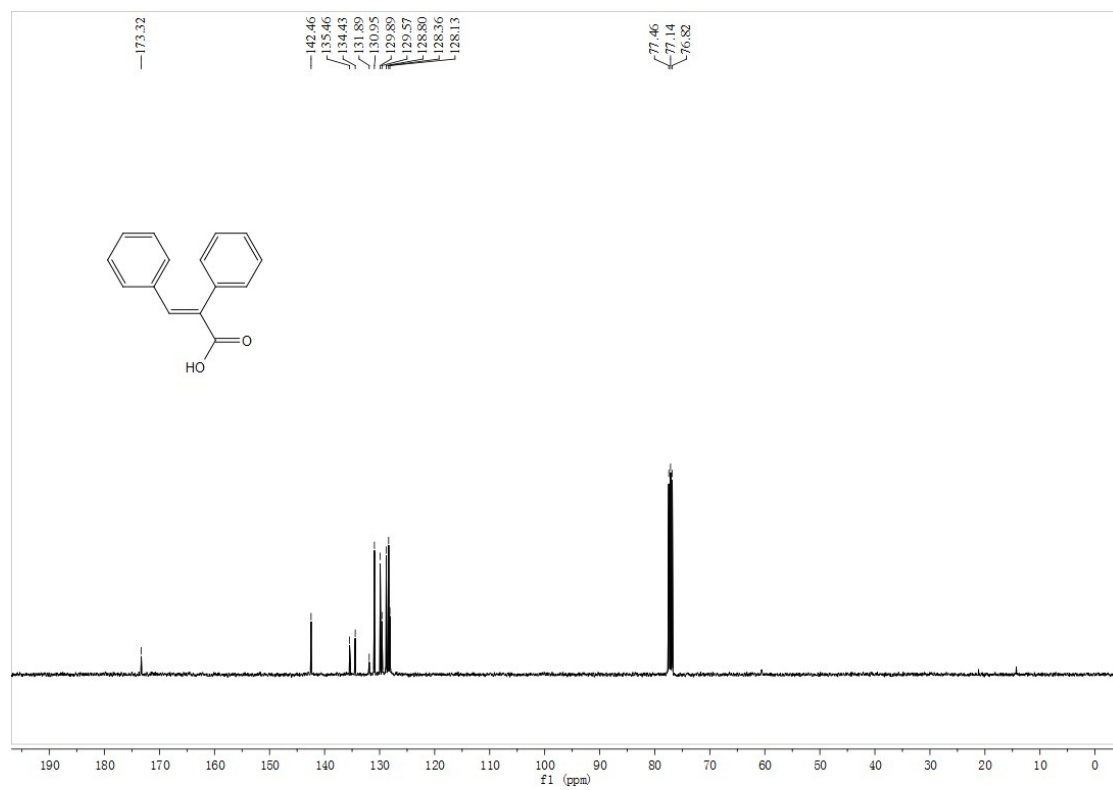

$^{13}\text{C NMR}$  of **2a**

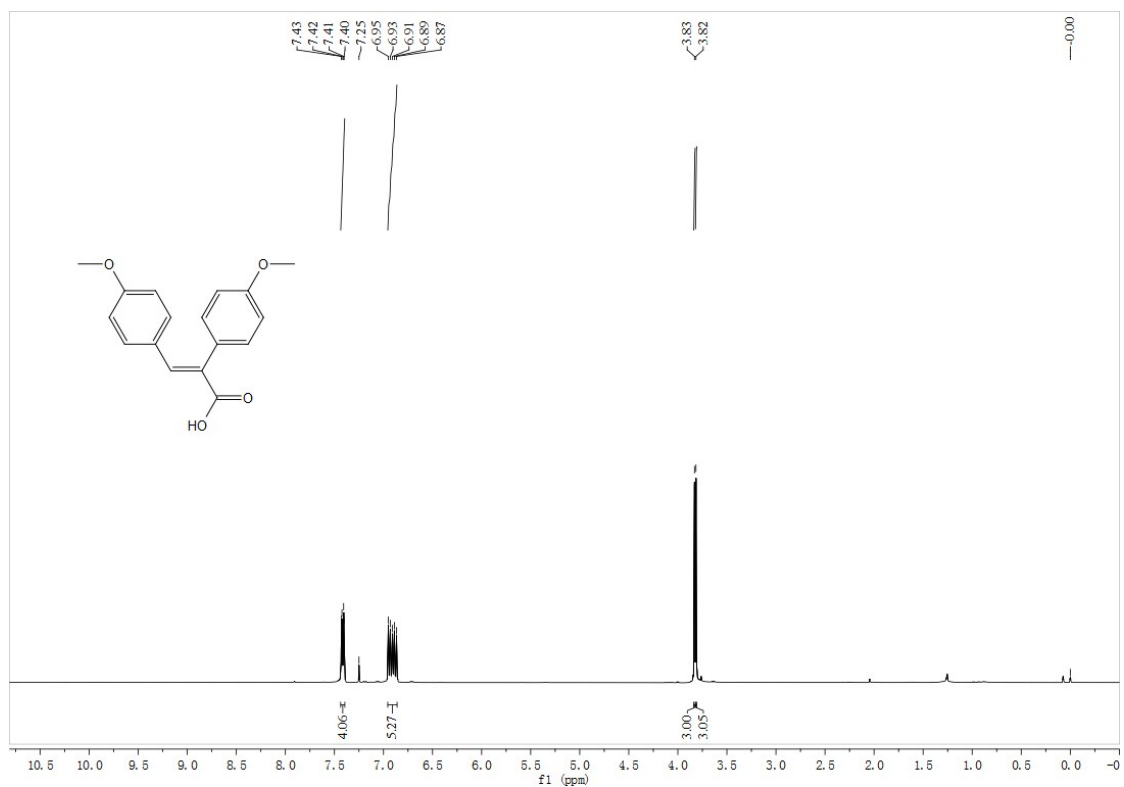

<sup>1</sup>H NMR of **2b**

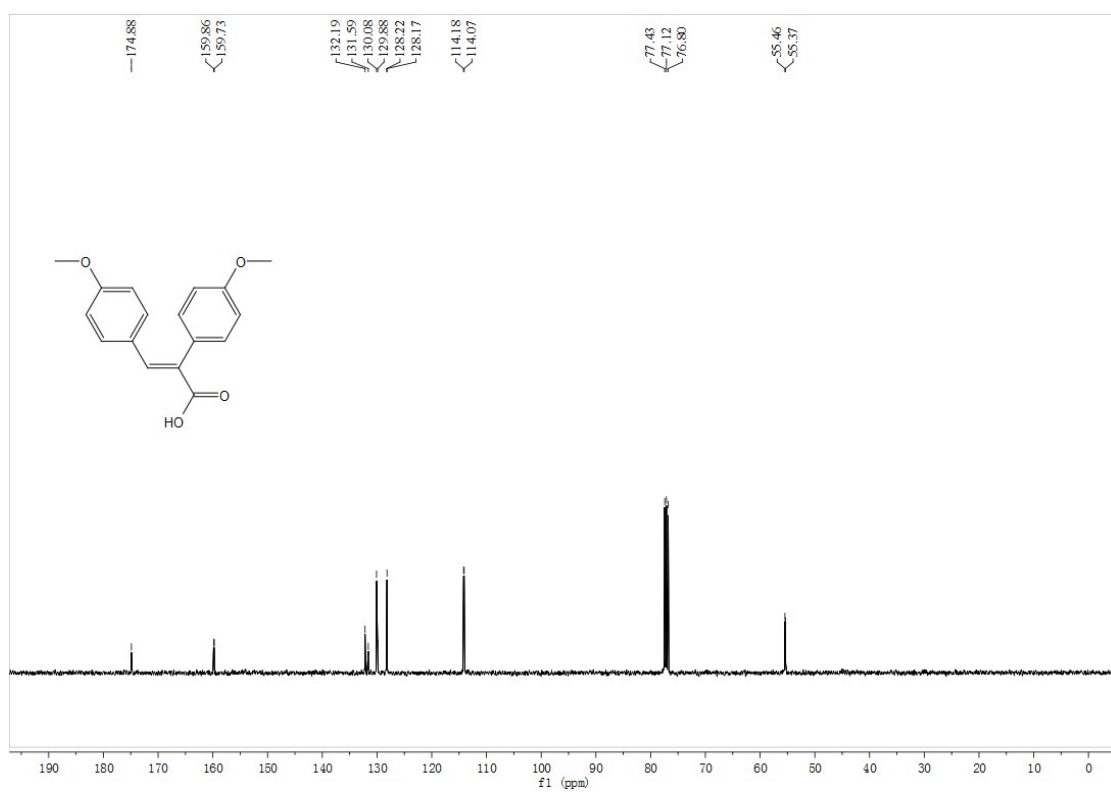

<sup>13</sup>C NMR of **2b**

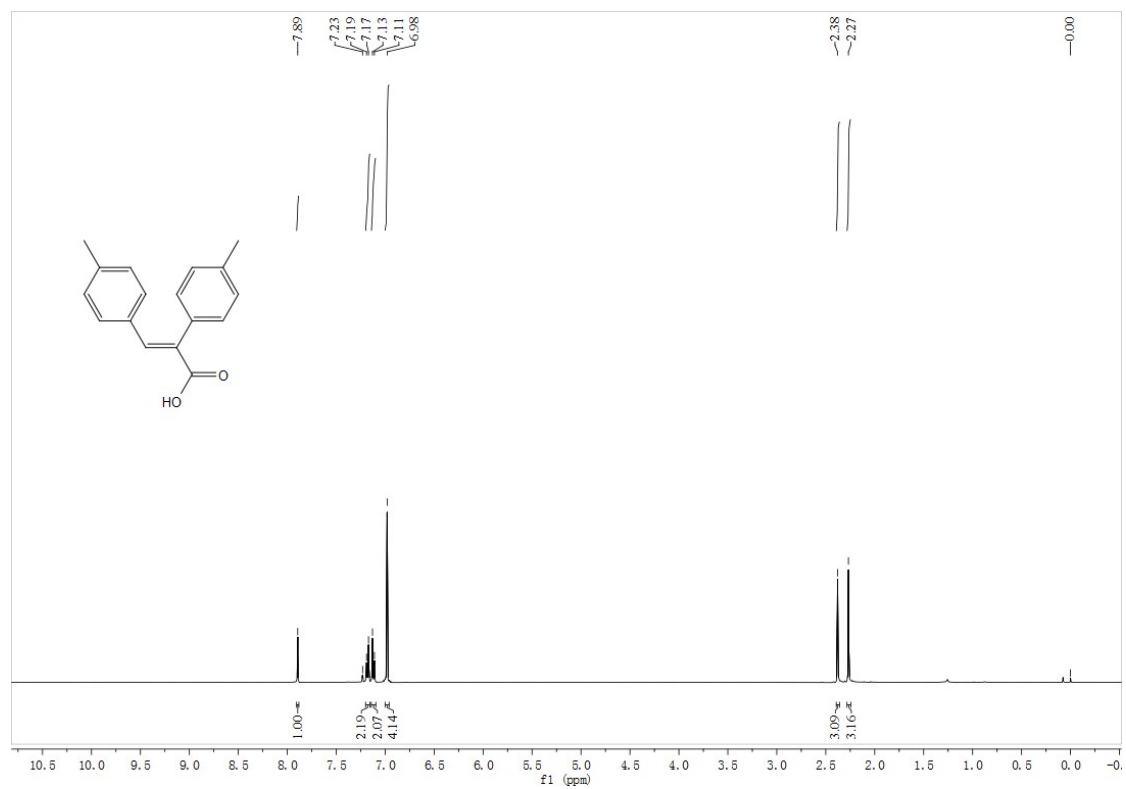

<sup>1</sup>H NMR of **2c**

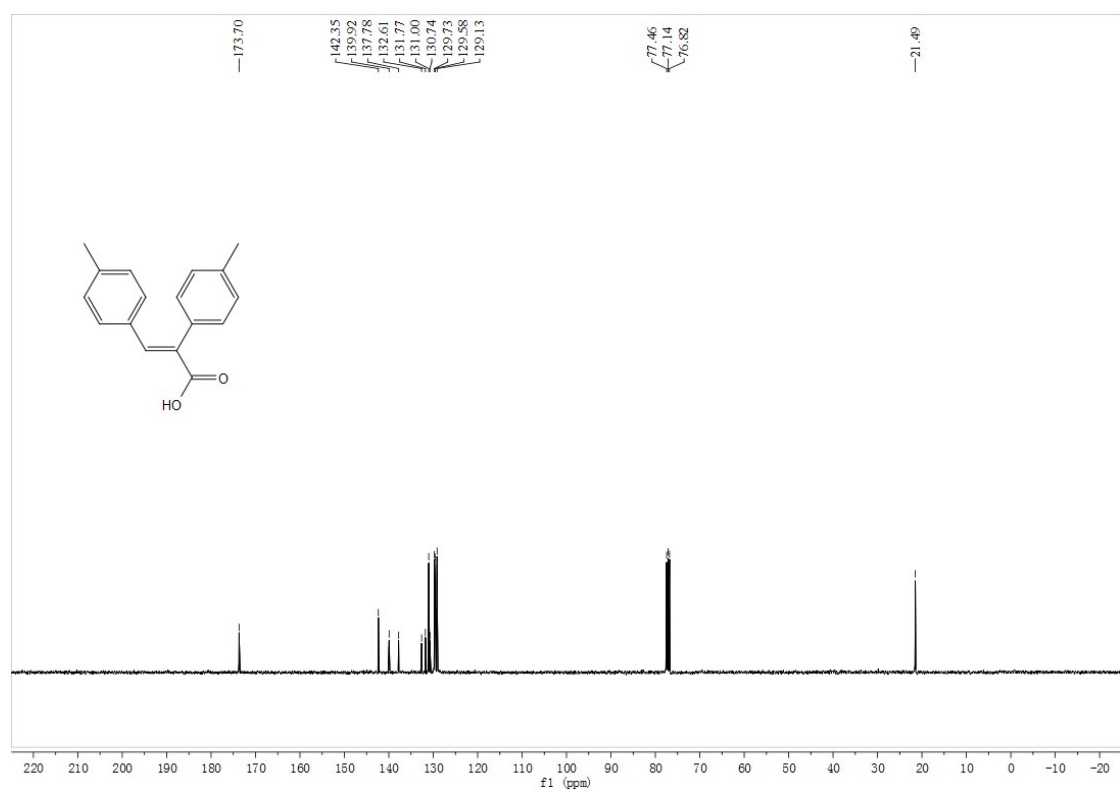

<sup>13</sup>C NMR of **2c**

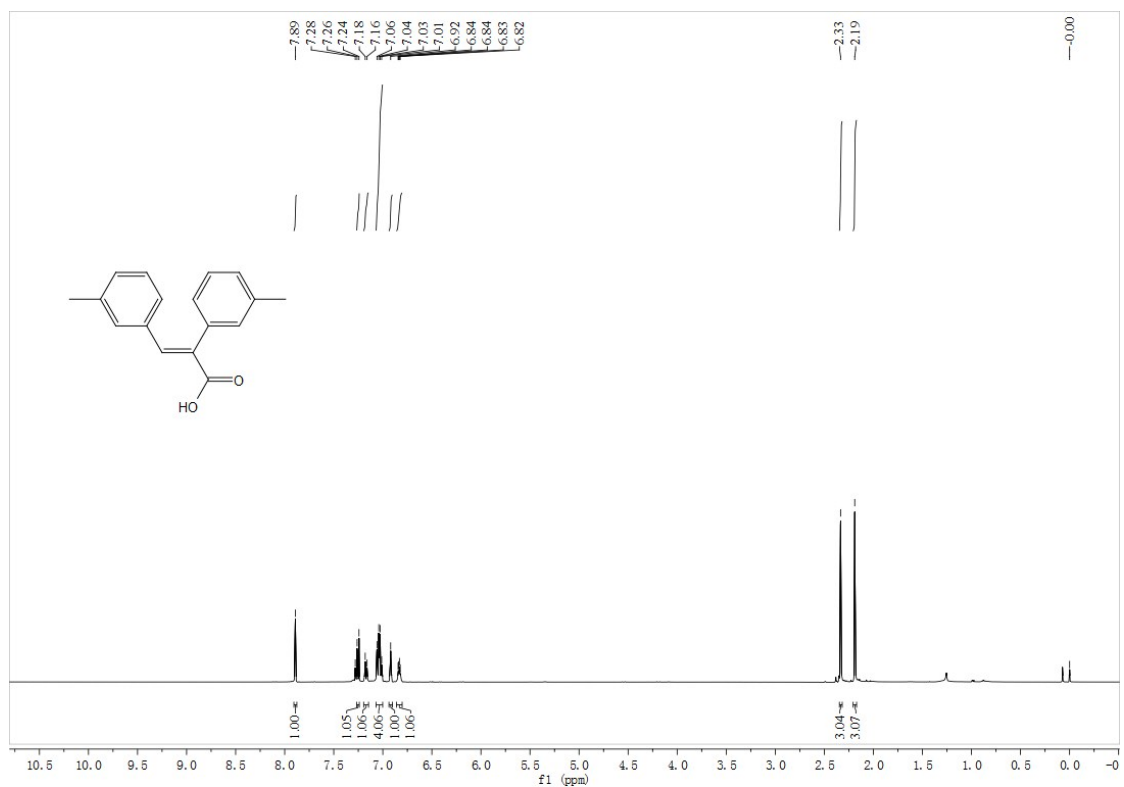

<sup>1</sup>H NMR of 2d

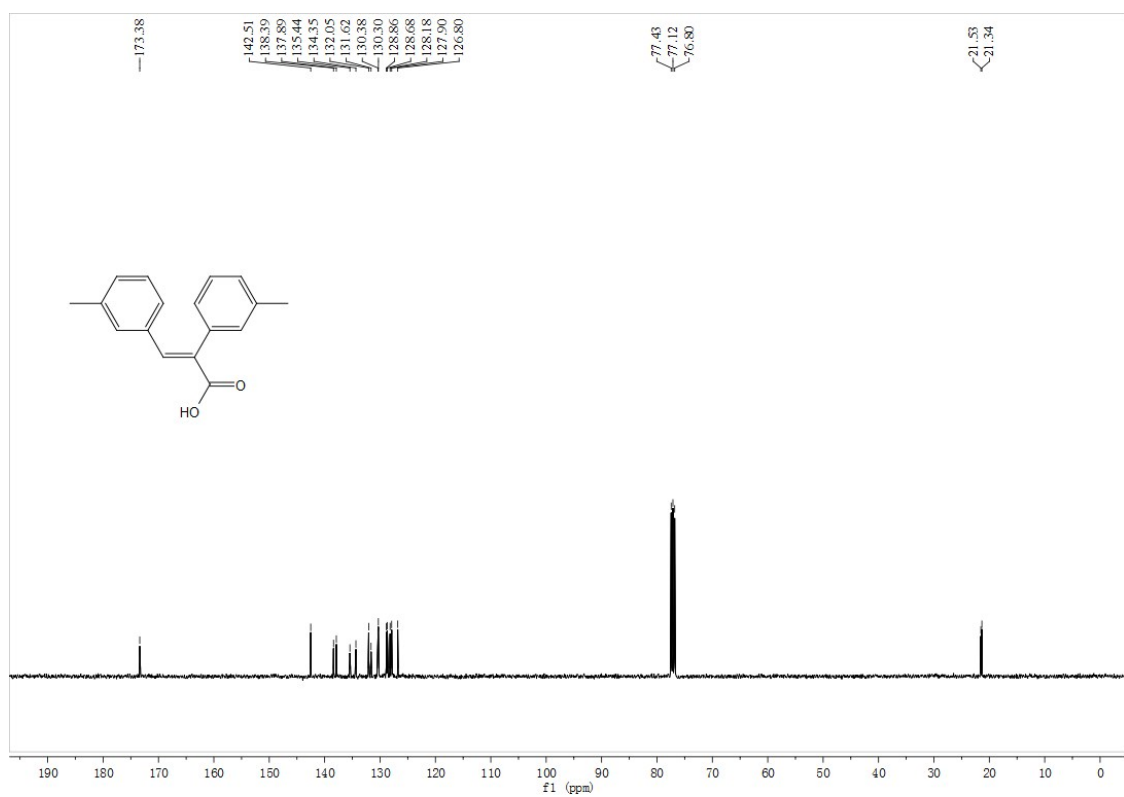

<sup>13</sup>C NMR of 2d

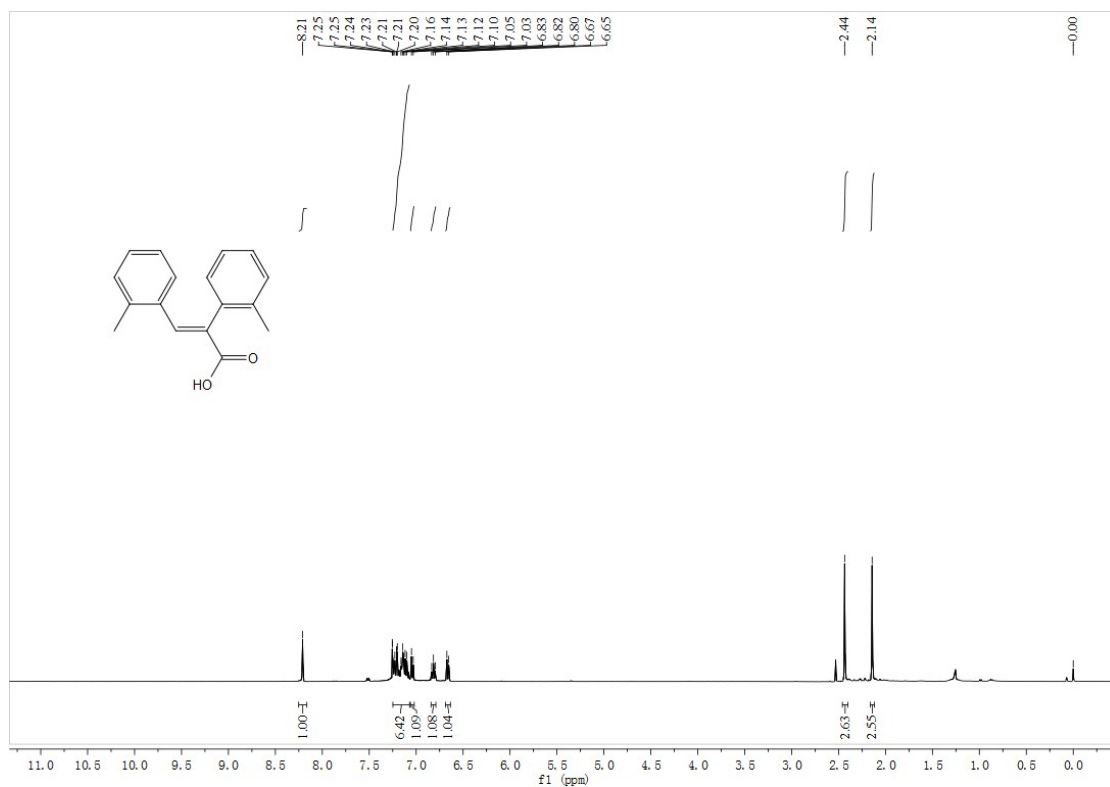

<sup>1</sup>H NMR of 2e

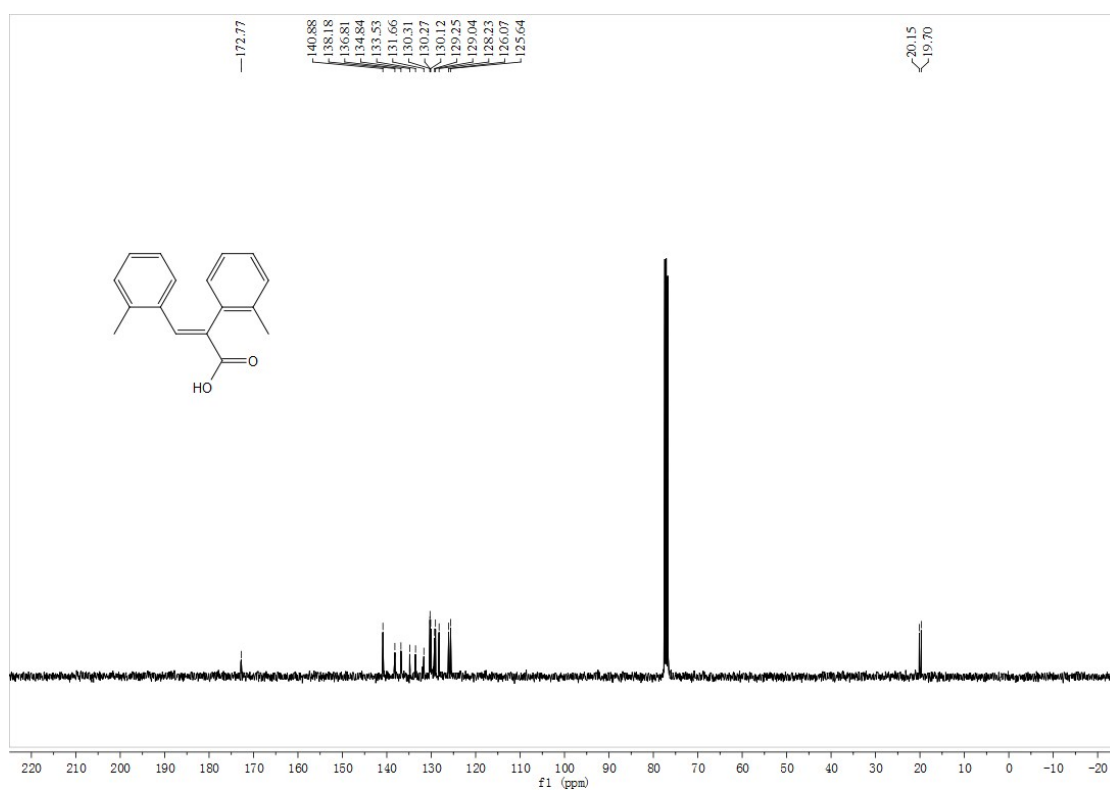

<sup>13</sup>C NMR of 2e

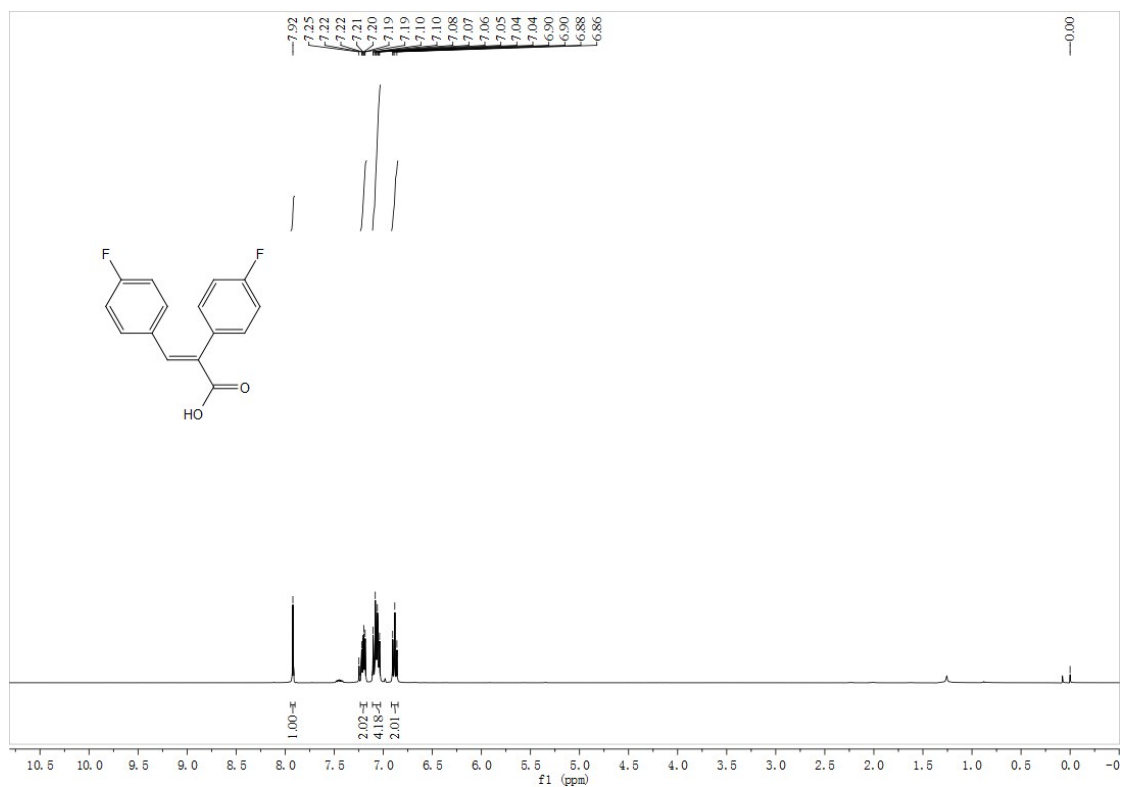

<sup>1</sup>H NMR of 2f

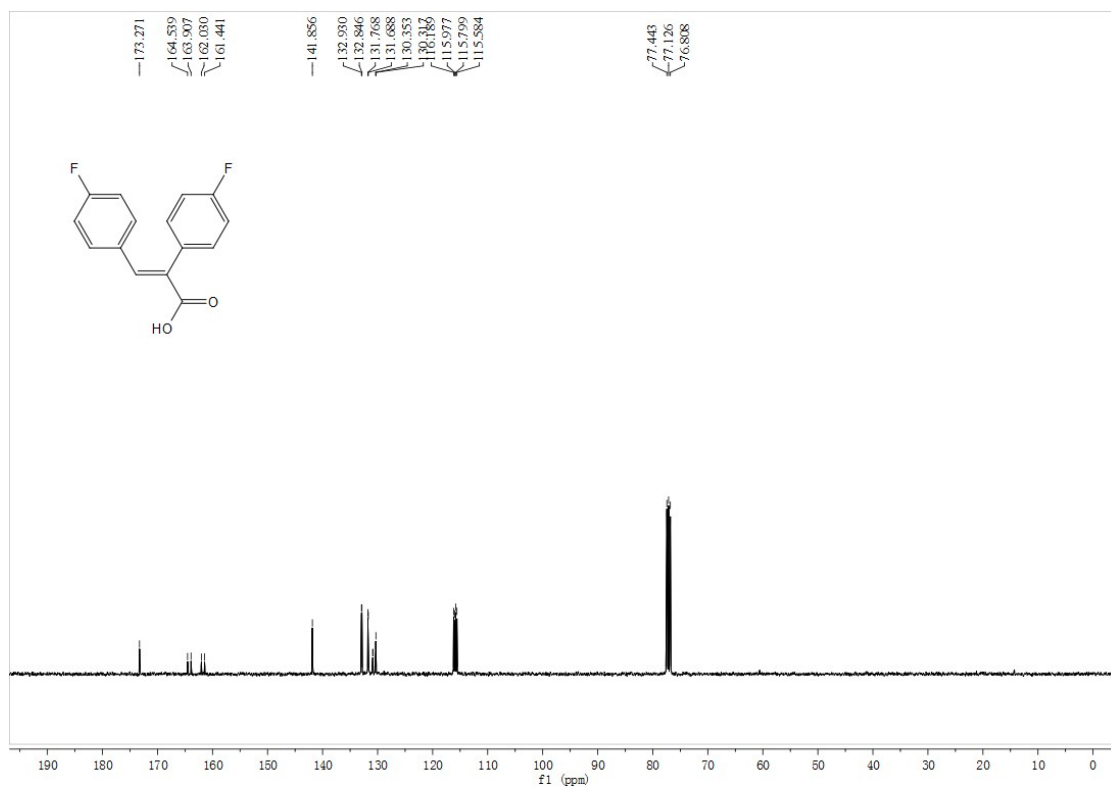

<sup>13</sup>C NMR of 2f

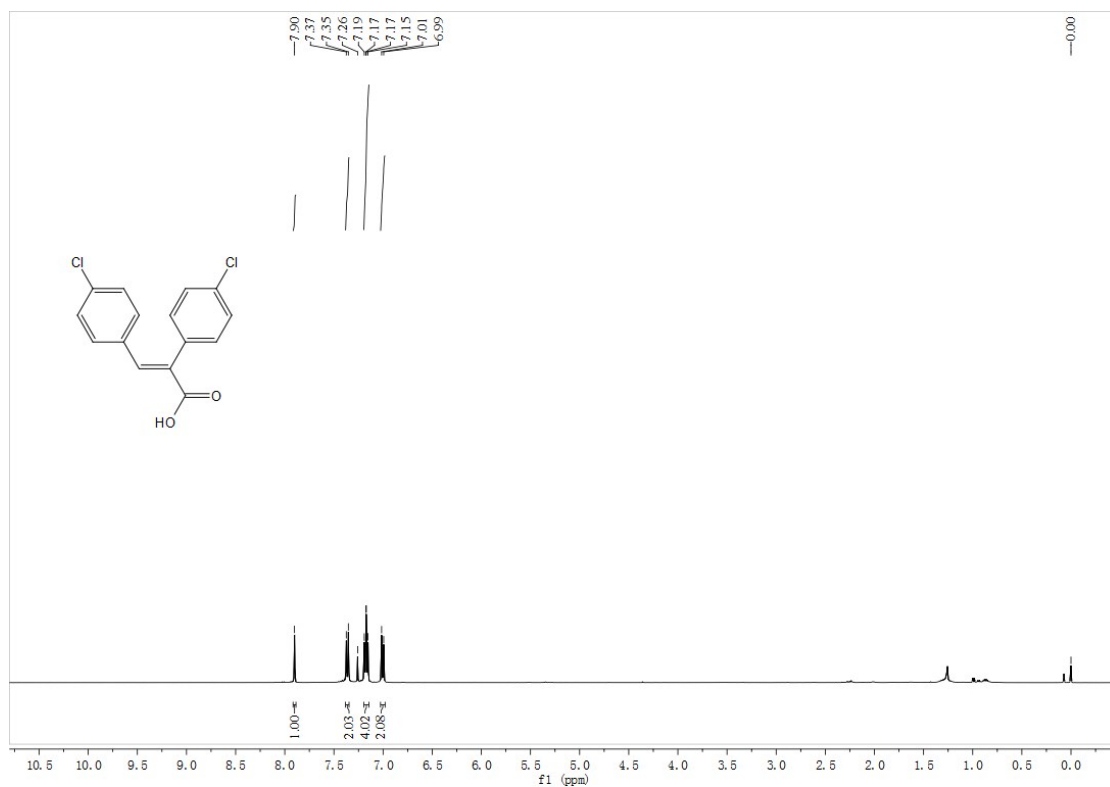

<sup>1</sup>H NMR of **2g**

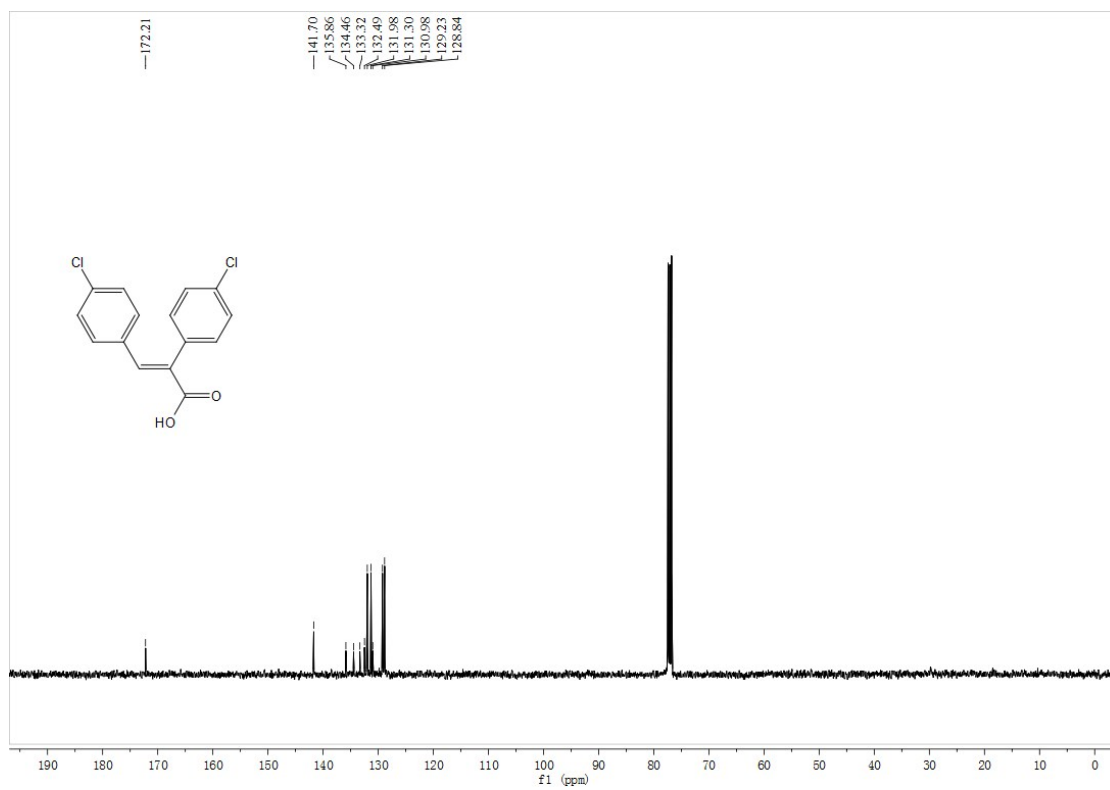

<sup>13</sup>C NMR of **2g**



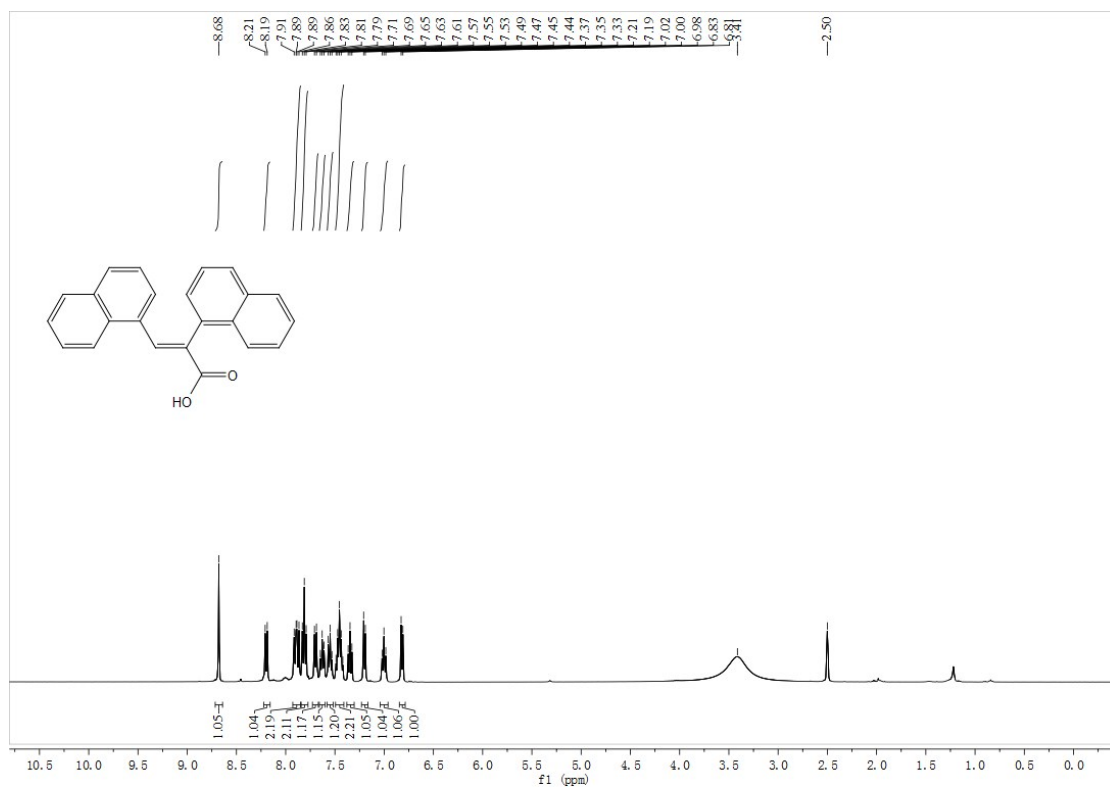

<sup>1</sup>H NMR of 2h

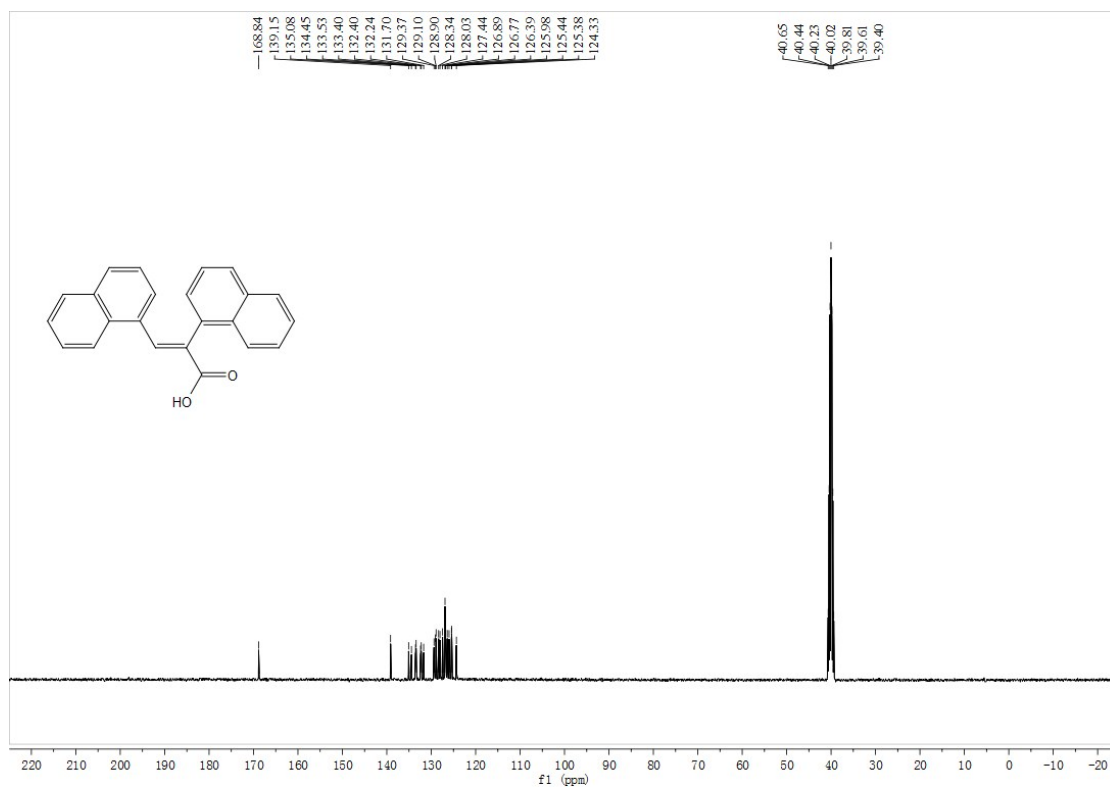

<sup>13</sup>C NMR of 2h

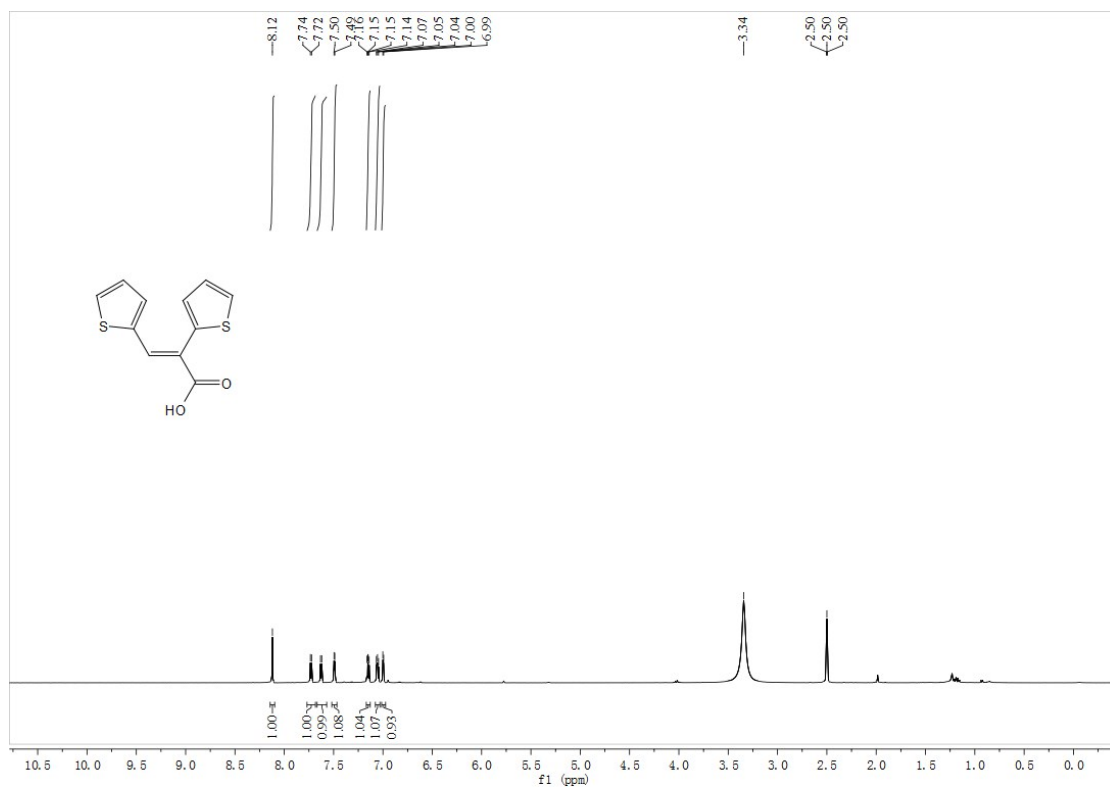

<sup>1</sup>H NMR of 2i

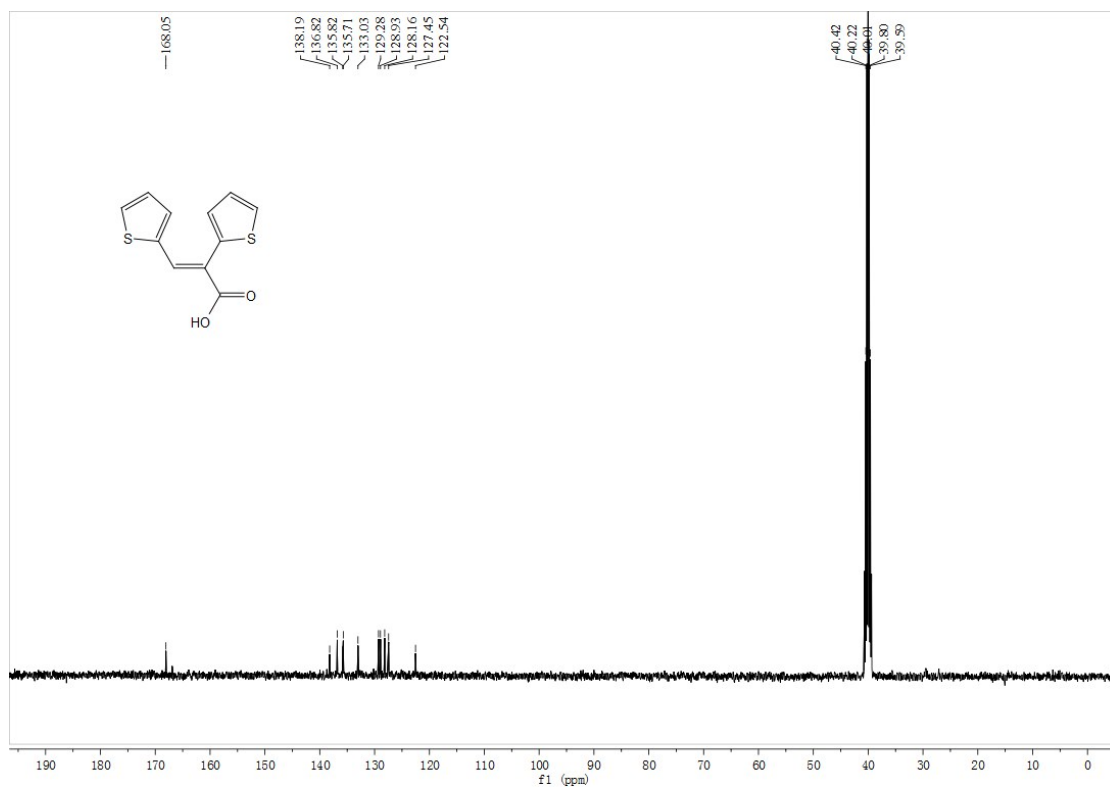

<sup>13</sup>C NMR of 2i

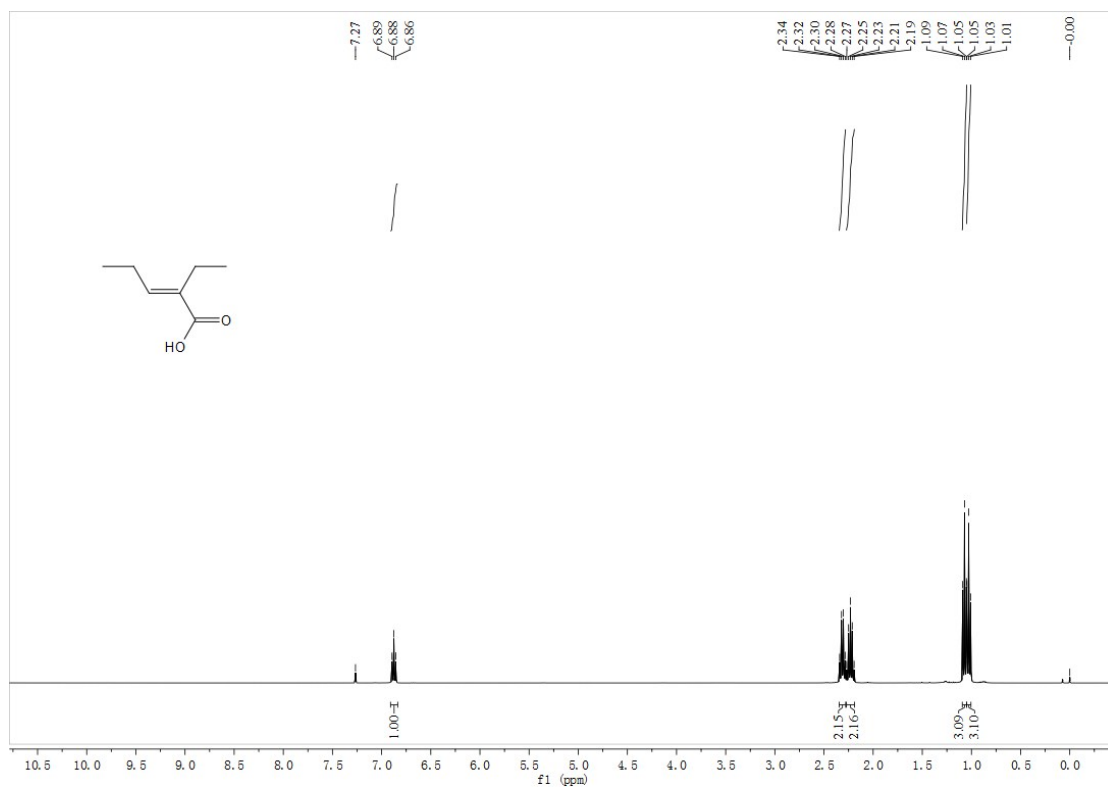

<sup>1</sup>H NMR of 2j

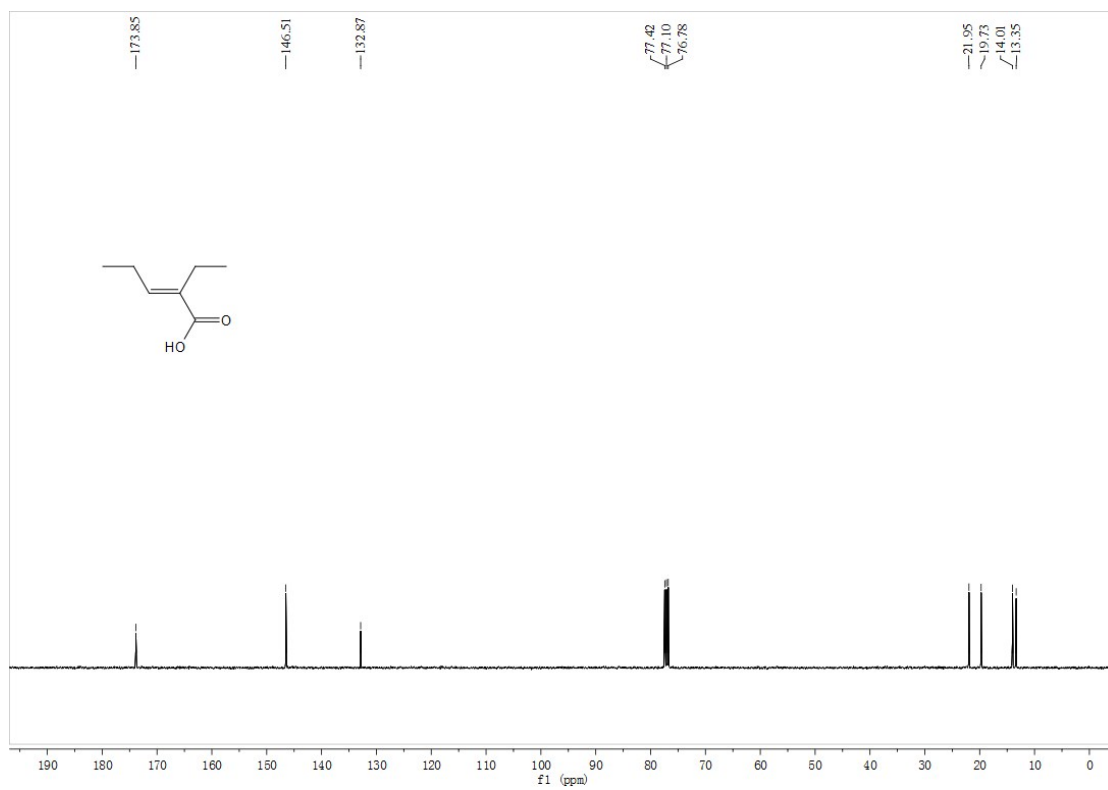

<sup>13</sup>C NMR of 2j

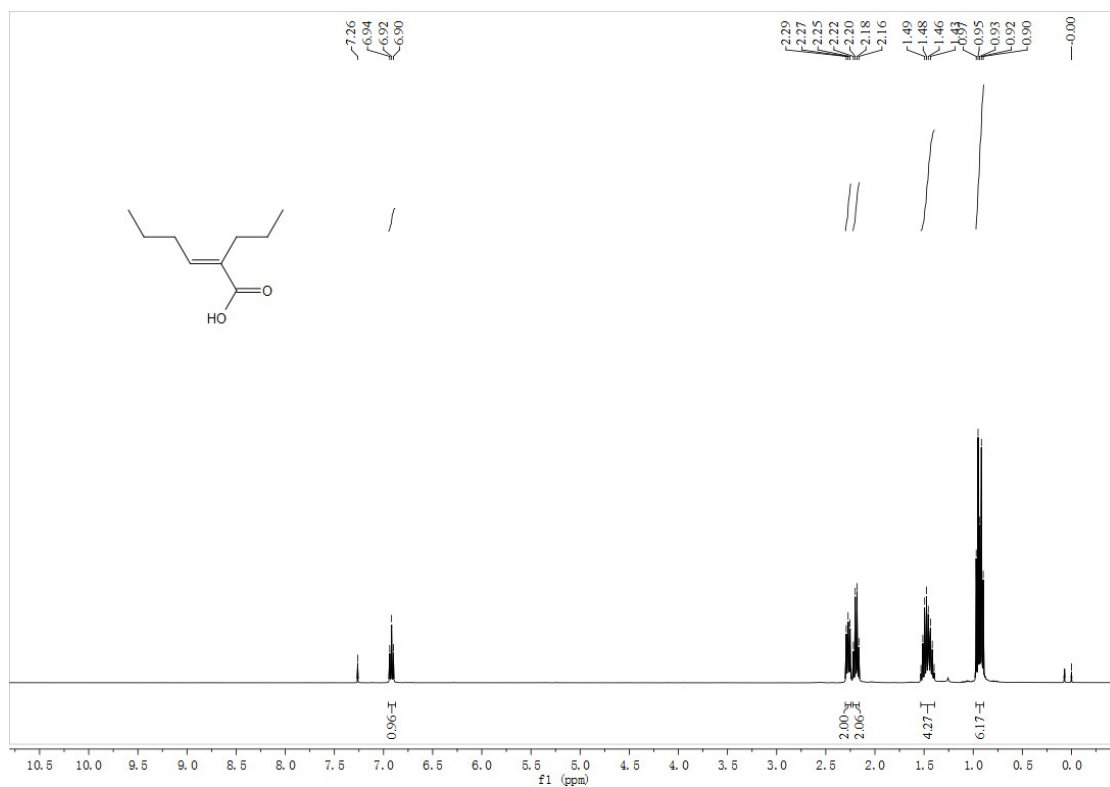

$^1\text{H NMR}$  of **2k**

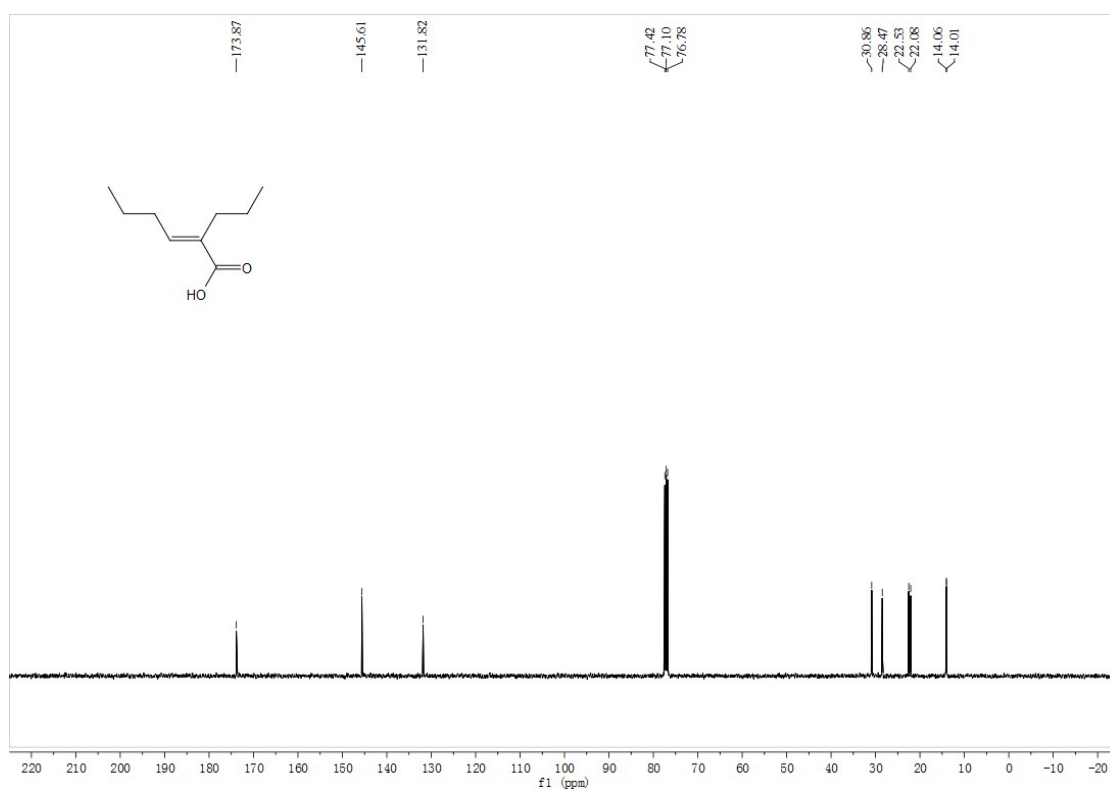

$^{13}\text{C NMR}$  of **2k**

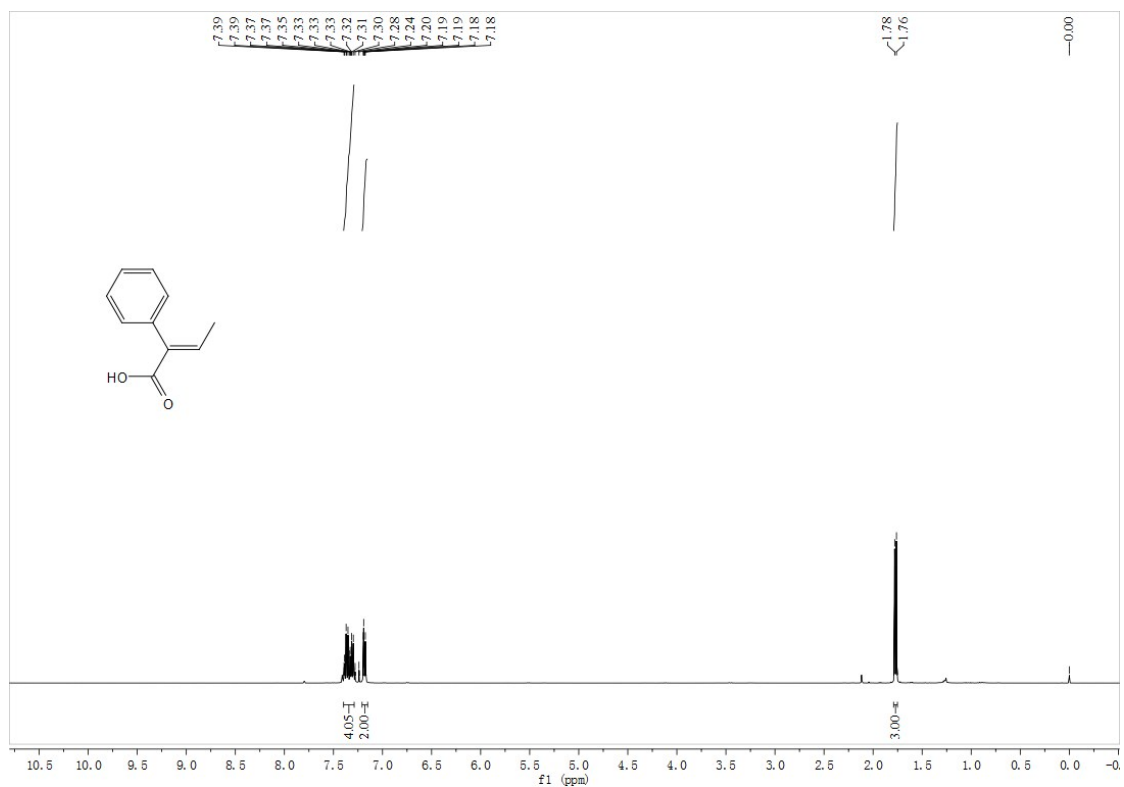

<sup>1</sup>H NMR of 21

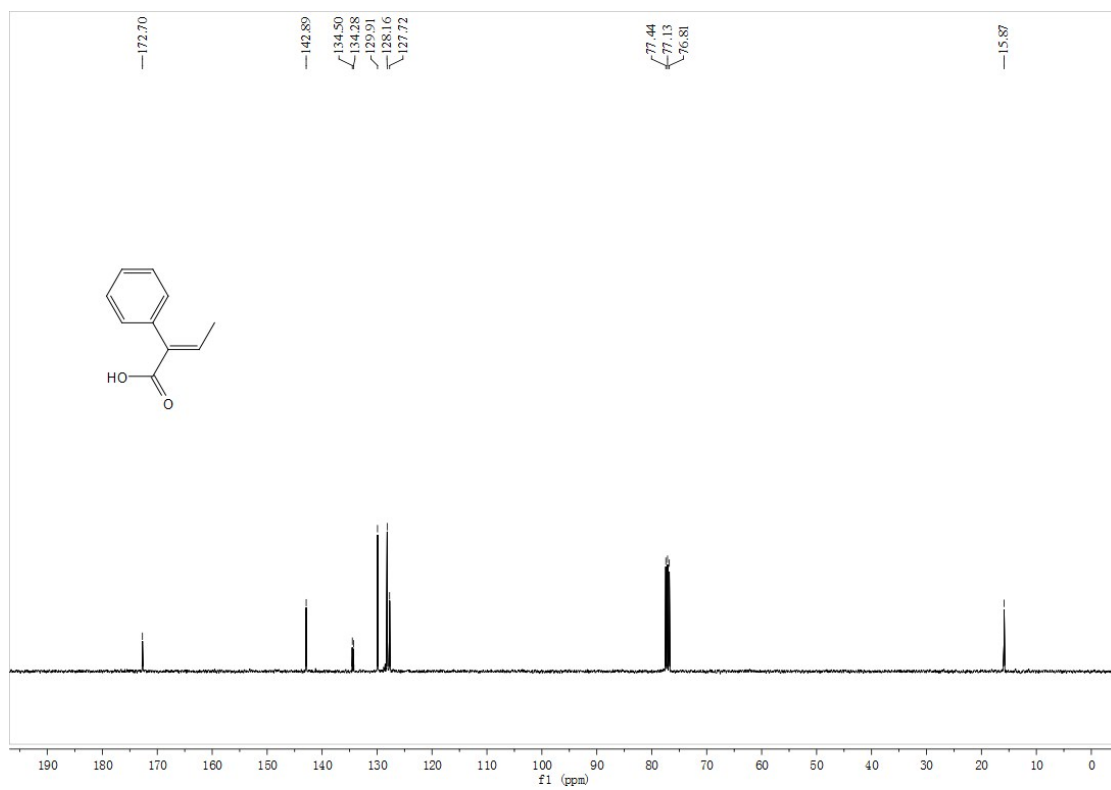

<sup>13</sup>C NMR of 21

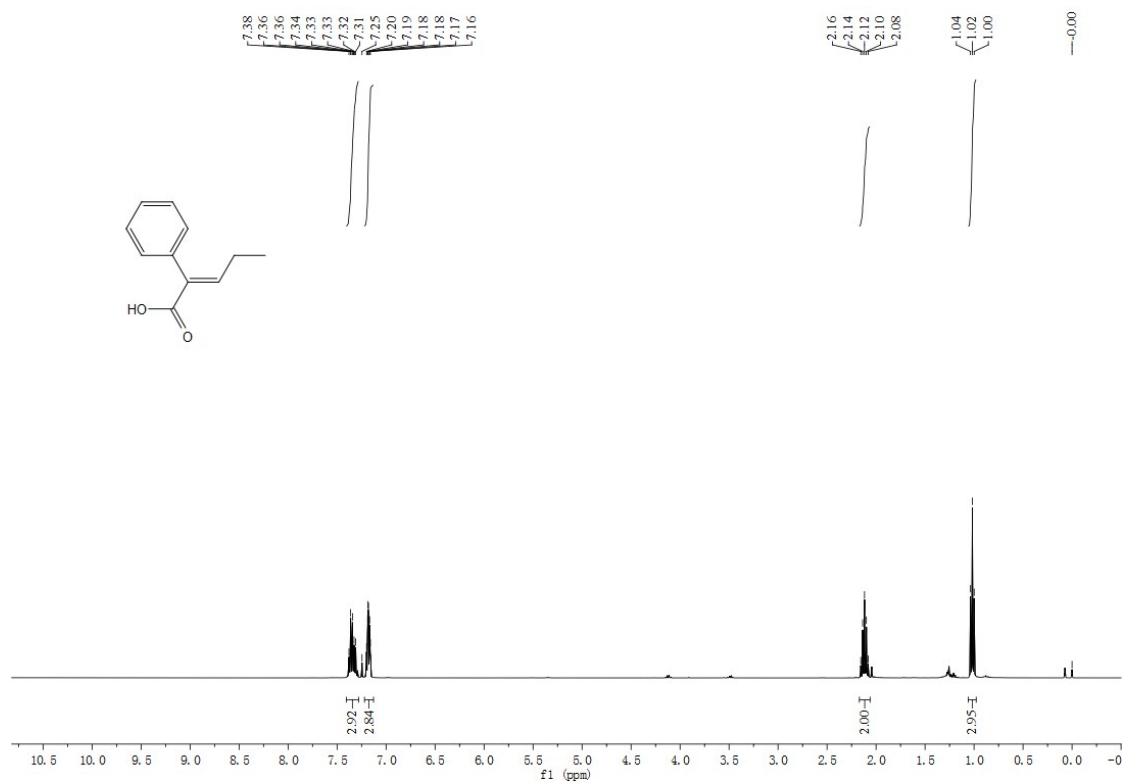

<sup>1</sup>H NMR of 2m

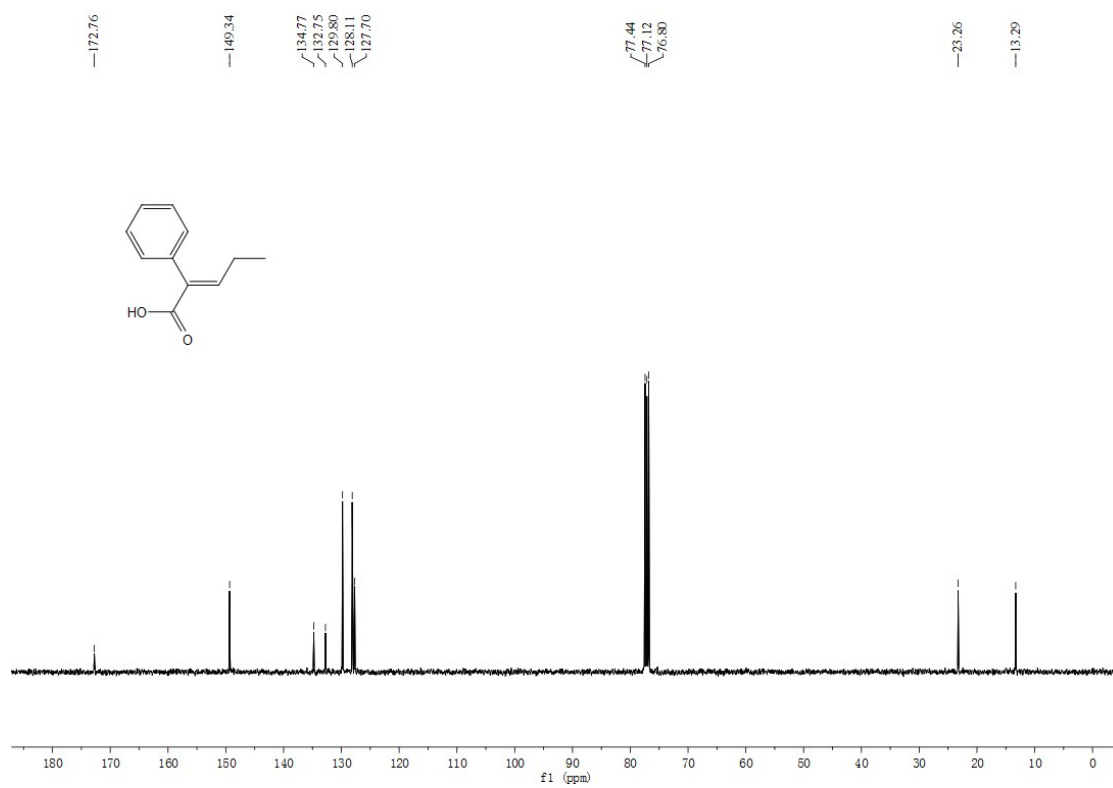

<sup>13</sup>C NMR of 2m

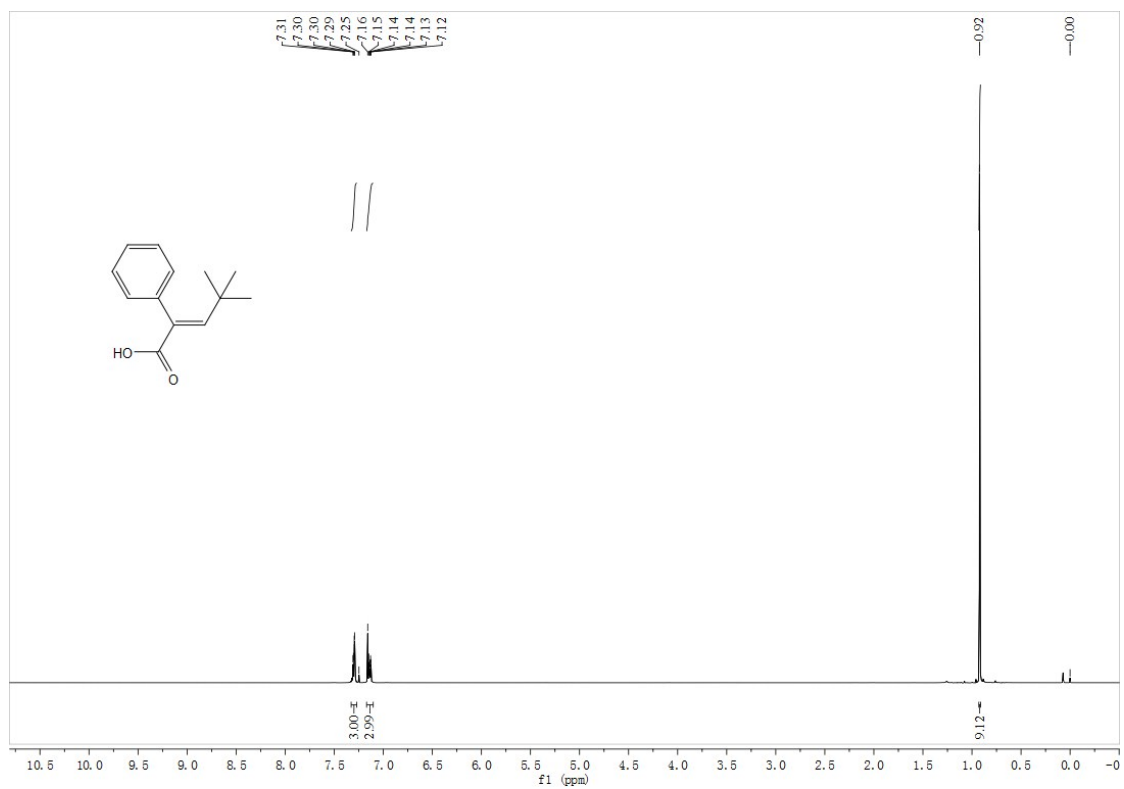

<sup>1</sup>H NMR of 2n

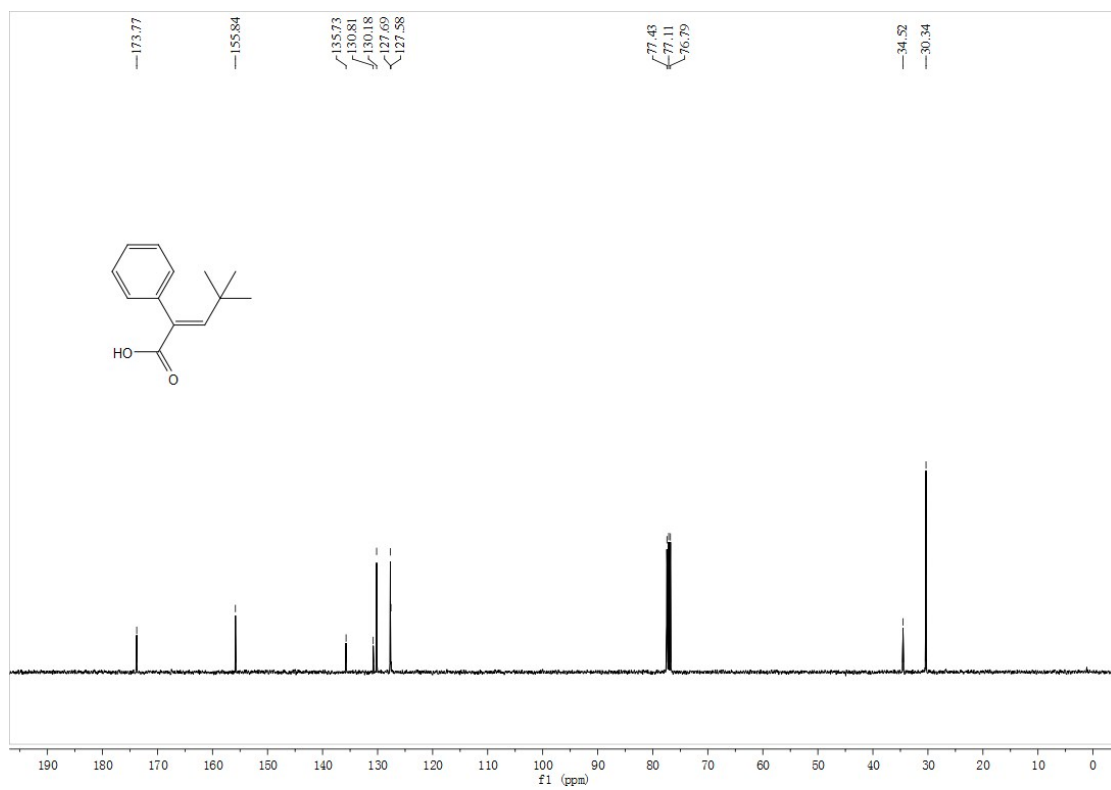

<sup>13</sup>C NMR of 2n

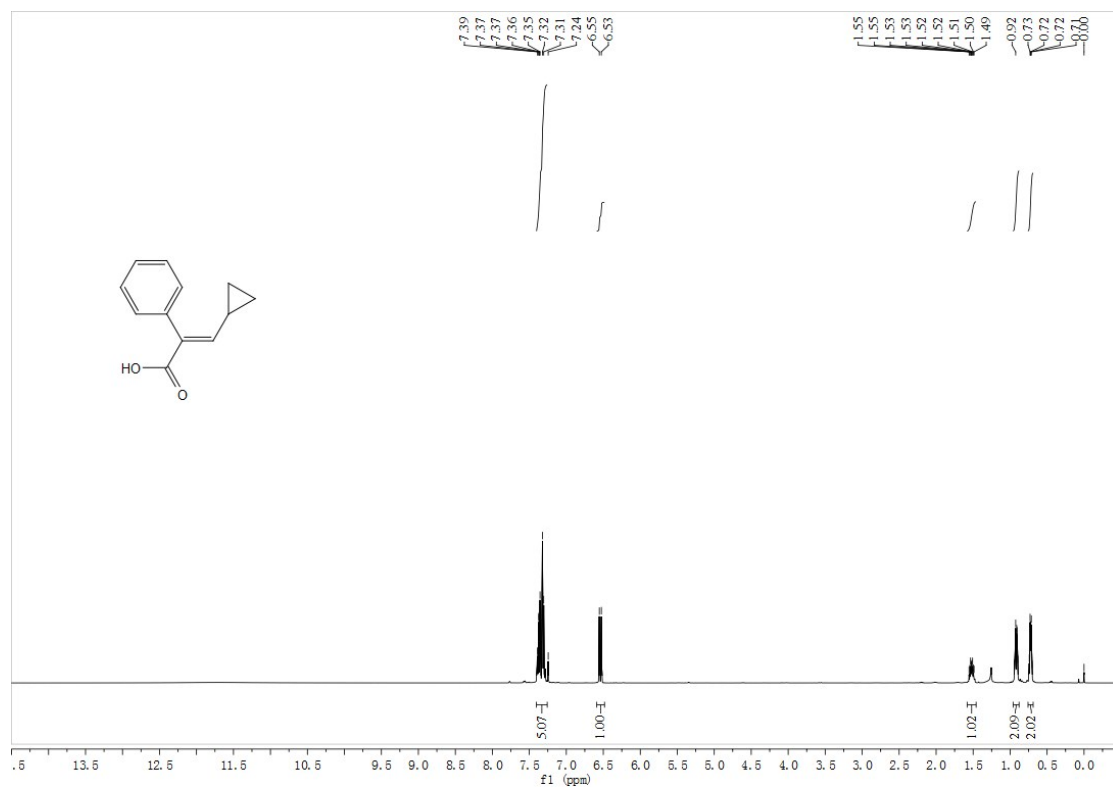

<sup>1</sup>H NMR of **2o**

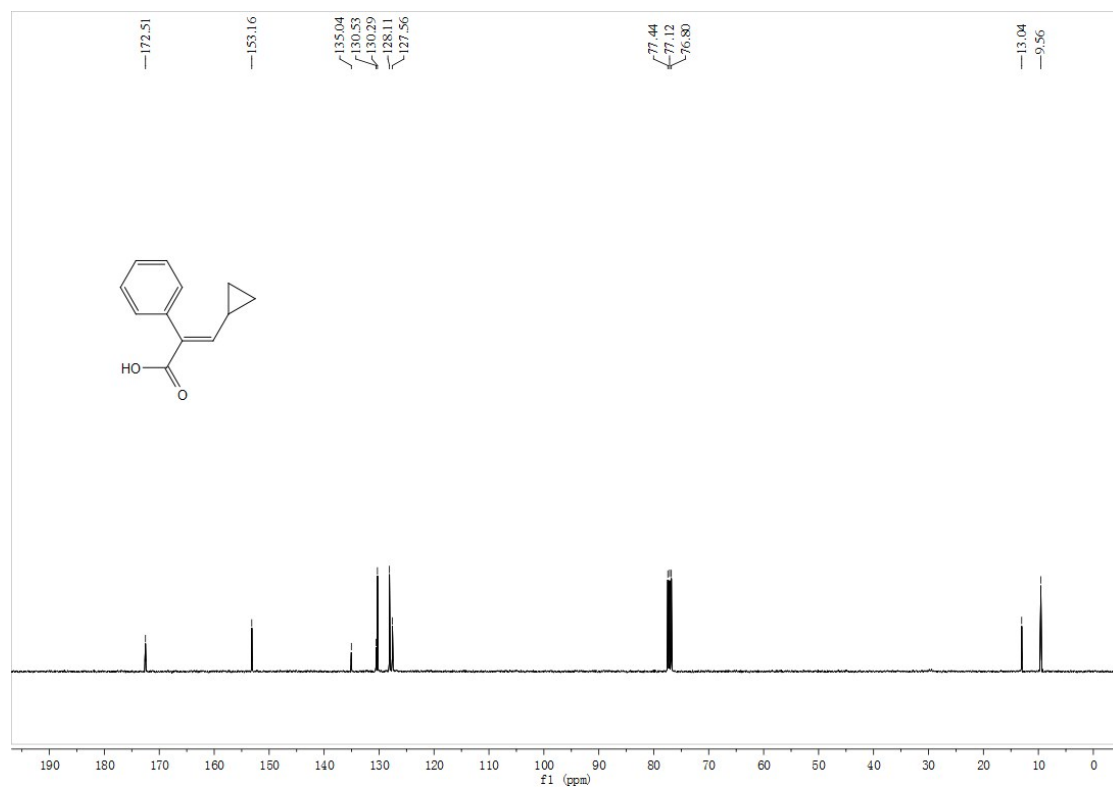

<sup>13</sup>C NMR of **2o**



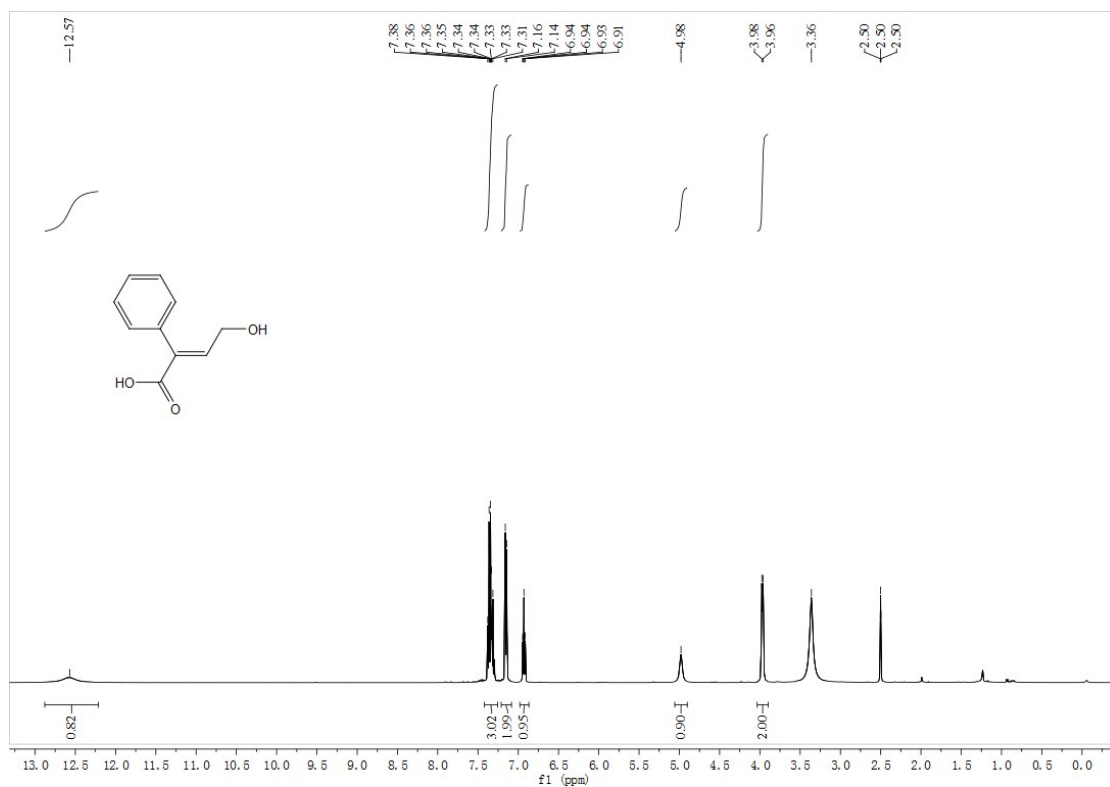

<sup>1</sup>H NMR of 2p

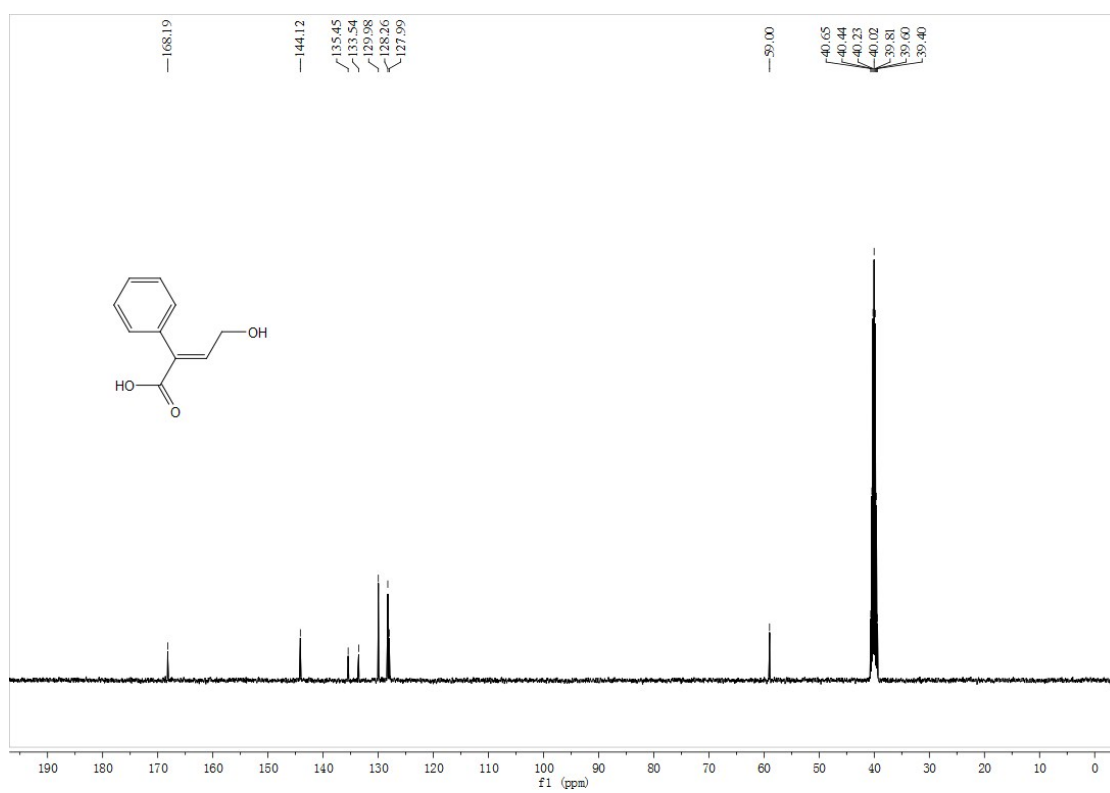

<sup>13</sup>C NMR of 2p

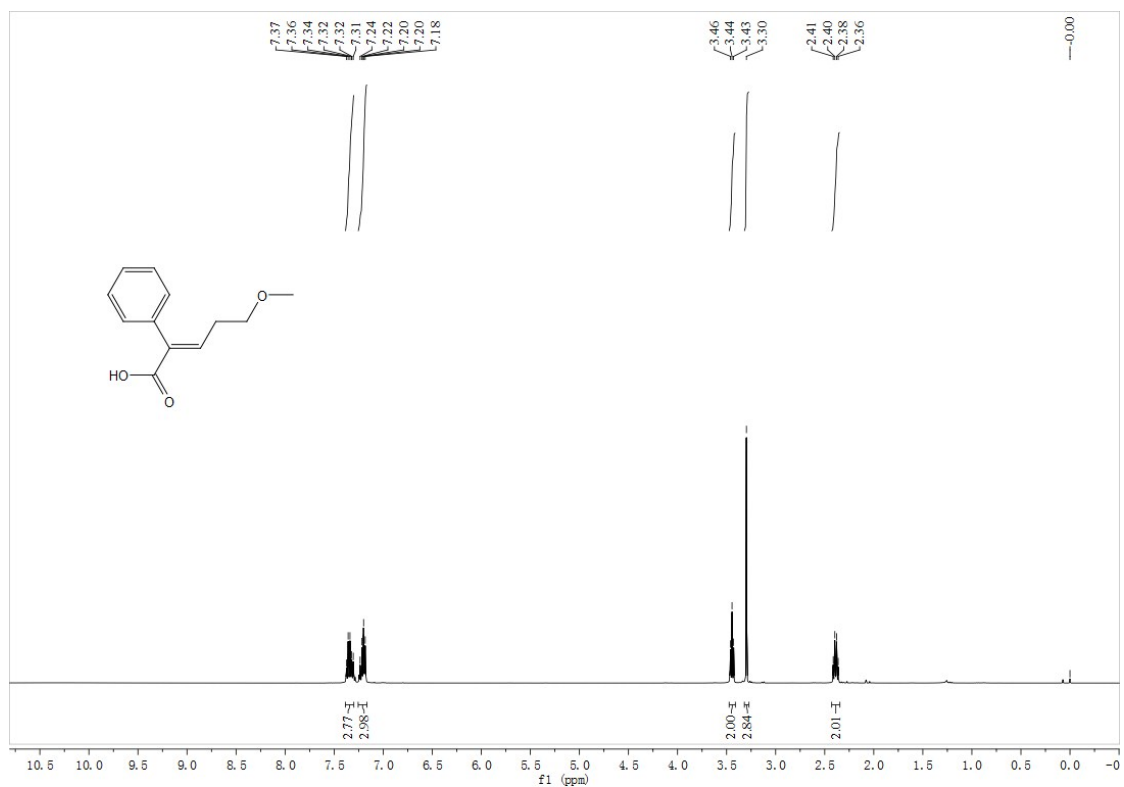

<sup>1</sup>H NMR of 2q

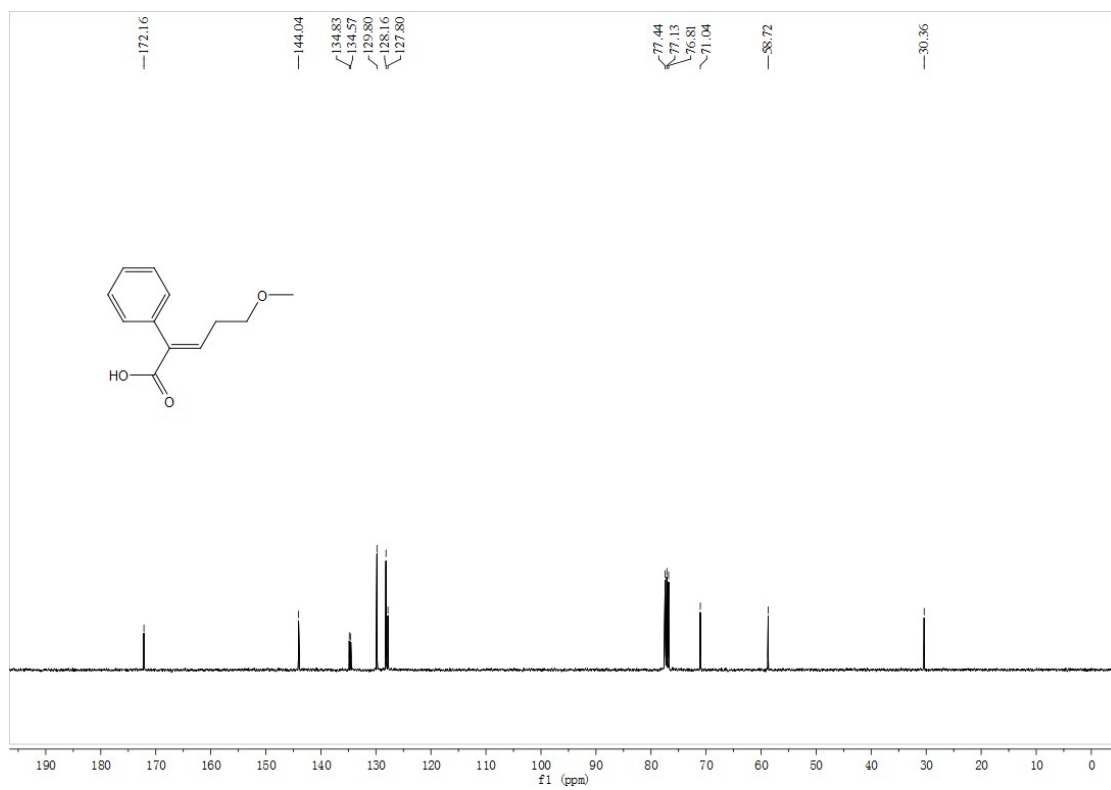

<sup>13</sup>C NMR of 2q

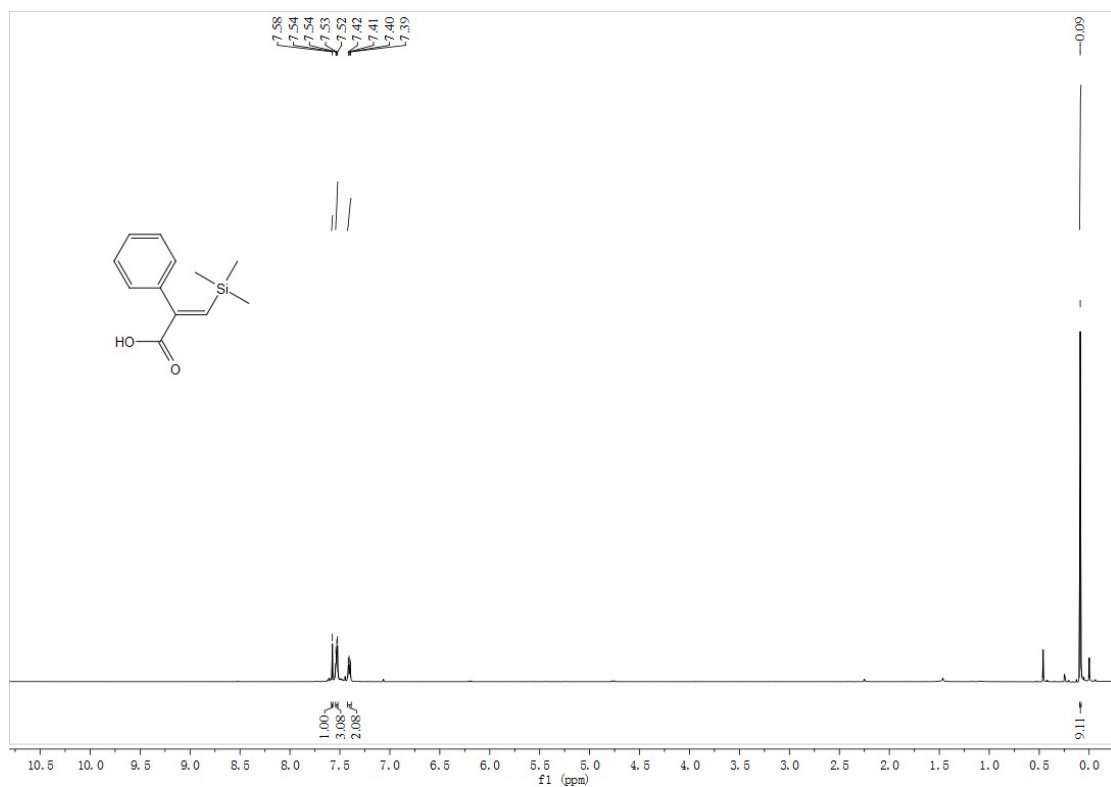

<sup>1</sup>H NMR of **2r**

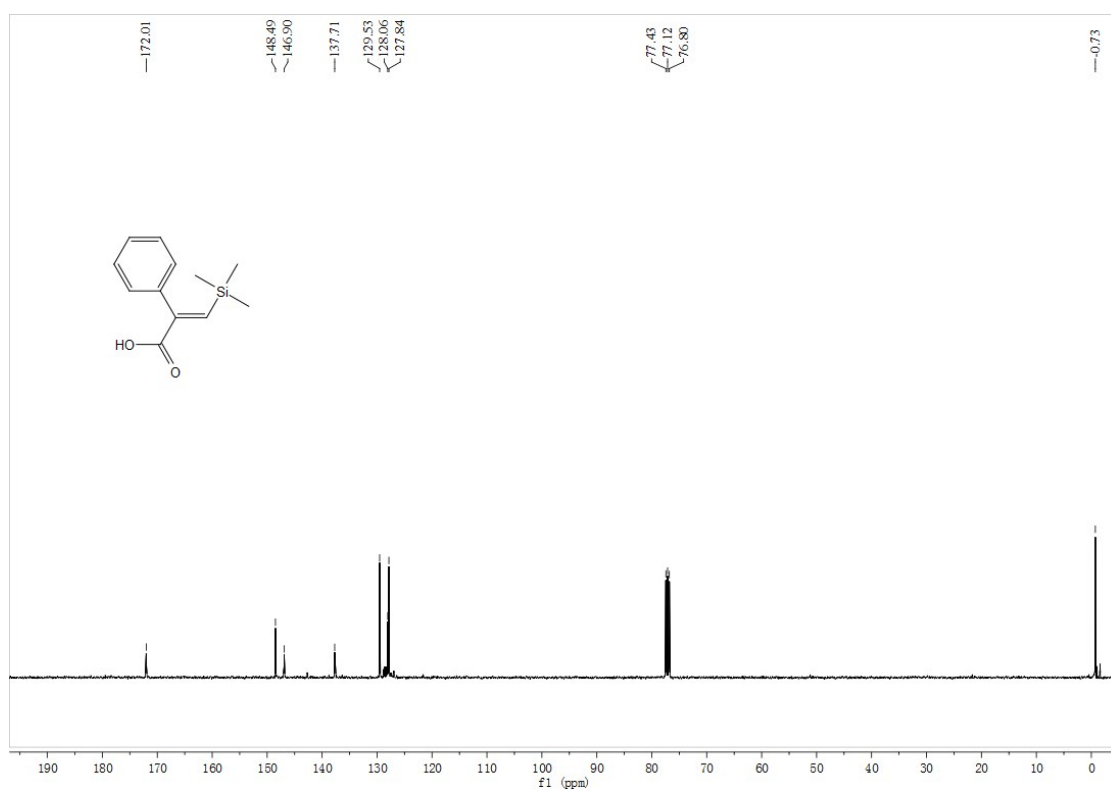

<sup>13</sup>C NMR of **2r**

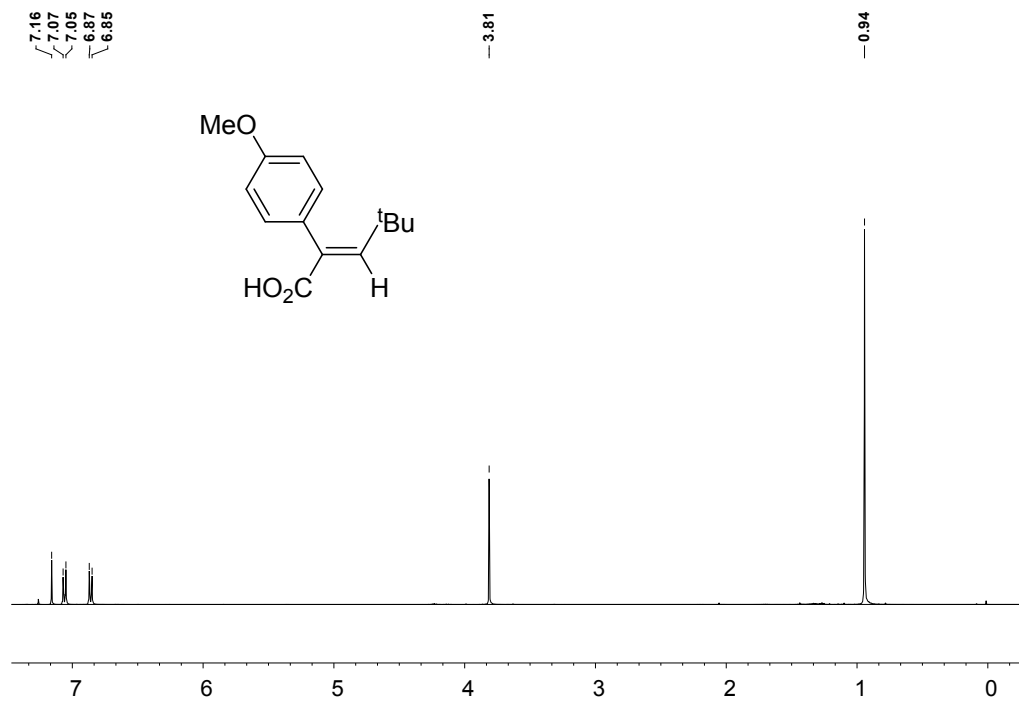

<sup>1</sup>H NMR of **2w**

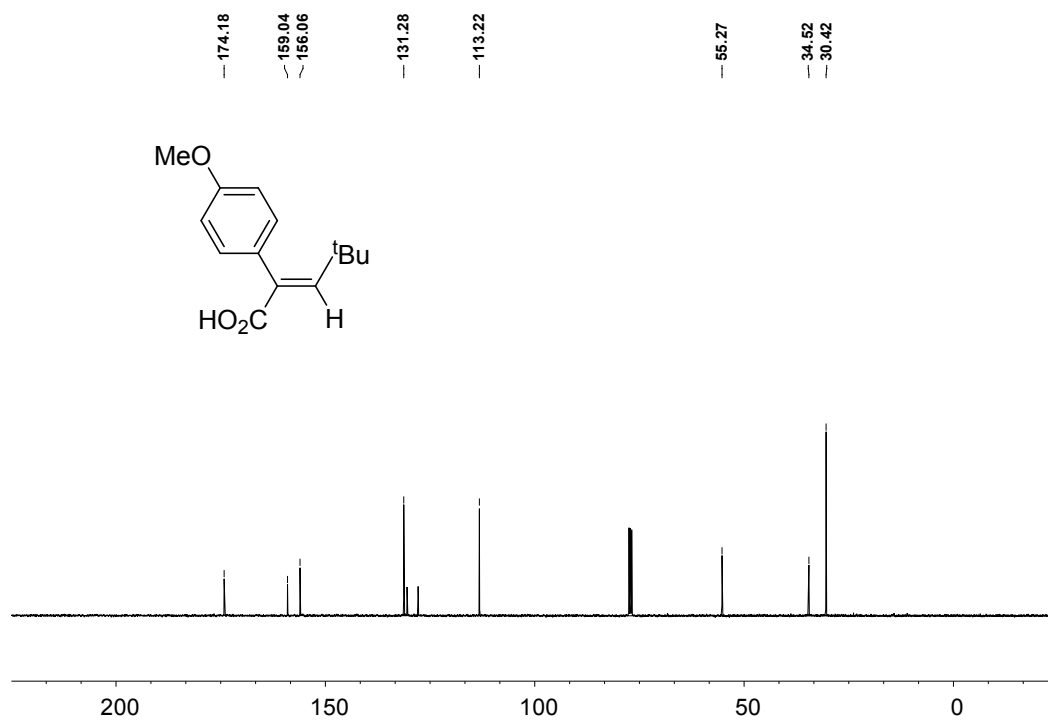

<sup>13</sup>C NMR of **2w**
